# Supplementary material
Source: publisher site journal article supplement (https://arthropod-systematics.arphahub.com/article/64252/download/suppl/35/)
Supplement: Supplementary file 1

## Sheet: Liophloeus
Table S1. List of collected specimens. Species in bold (column D) have been recognized basing on the morphological study of particular specimen, species with normal font have been recognized based on study of different males found in the same place.
Code	Region	Place	Morphology	ITS	COI	28S
1	Bosnia and Herzegovina: near Bjelašnica (Dinaric Alps)	Bradina (Konjic) 43.74046, 18.02575	L. tessulatus	none	none	L.tessulatus
2	Bosnia and Herzegovina: northern east (Dinaric Alps)	Knezevo 44.53746, 17.34011	none	none	L.gibbus MT858362	L.lentus MN190723
3	Bosnia and Herzegovina: Rakitnica valley (Dinaric Alps)	Rogatica 43.78756, 19.01091	L. pupillatus	none	none	L.pupillatus MN190724
4	Bosnia and Herzegovina: Rakitnica valley (Dinaric Alps)	Rogatica 43.78756, 19.01091	L. pupillatus	none	none	L.pupillatus MN190725
5	Bosnia and Herzegovina: Mokra Gora (Dinaric Alps)	Oplave 43.75286, 19.42929	Liophloeodes	none	none	L.lentus MN190726
6	Bosnia and Herzegovina: Mokra Gora (Dinaric Alps)	Oplave 43.75286, 19.42929	none	none	L.gibbus MT858363	L.lentus MN190727
8	Serbia: Goc	Vrnjačka Banja 43.5625, 20.84138	L. tessulatus	none	none	L.tessulatus MN190728
9	Serbia: Golija	Knezevici 43.7831, 19.74545	Liophloeodes	none	L.gibbus MT858364	L.lentus MN190729
11	Poland: Tatry Zachodnie	Spyrłówka 49.27557, 19.88989	L. lentus	none	L.gibbus MT858365	L.lentus MN190730
12	Poland: Tatry Zachodnie	Spyrłówka 49.27557, 19.88989	L. lentus	none	none	L.lentus MN190731
13	Hungary: Bukk	Miszkolc 48.12055, 20.66186	Liophloeodes	none	L.gibbus MT858366	L.gibbus MN190732
14	Hungary: Bukk	Miszkolc 48.12055, 20.66186	Liophloeodes	none	none	none
15	Hungary: Matra	Parádsasvár 47.91731, 19.99308	Liophloeodes	none	none	none
16	Hungary: Zempleni	Zsujta 48.50608, 21.31005	L. gibbus	none	L.lentus MT858367	L.gibbus MN190733
17	Hungary: Zempleni	Zsujta 48.50608, 21.31005	L. gibbus	none	none	L.gibbus MN190734
19	Hungary: Zempleni	Zsujta 48.50608, 21.31005	L. gibbus	none	none	L.gibbus MN190735
20	Hungary: Zempleni	Zsujta 48.50608, 21.31005	L. gibbus	none	none	L.gibbus MN190736
23	Hungary: Börzsöny	Szendehely 47.83891, 19.09037	Liophloeodes	none	L.lentus MT858368	L.lentus MN190737
24	Hungary: Börzsöny	Szendehely 47.83891, 19.09038	Liophloeodes	none	L.lentus MT858369	L.lentus MN190738
25	Hungary: Börzsöny	Szendehely 47.83891, 19.09039	Liophloeodes	none	L.lentus MT858370	L.lentus MN190739
26	Hungary: Börzsöny	Szendehely 47.83891, 19.09040	Liophloeodes	none	L.lentus MT858371	L.lentus MN190740
27	Hungary: Mecsek	Husztot 46.16183, 18.09172	Liophloeodes	none	L.lentus MT858372	L.lentus MN190741
28	Hungary: Mecsek	Husztot 46.16183, 18.09172	Liophloeodes	none	L.lentus MT858373	L.lentus MN190742
29	Hungary: Mecsek	Husztot 46.16183, 18.09172	Liophloeodes	none	L.lentus MT858374	L.lentus MN190743
30	Hungary: Bukk	Malyinka 48.15152, 20.49766	L. gibbus	none	none	L.gibbus MN190744
31	Hungary: Mecsek	Abaliget 46.14287, 18.11522	Liophloeodes	none	L.lentus MT858375	L.lentus MN190744
32	Slovakia: Nizke Tatry	Kremnica 48.73978, 18.92373	L. lentus	none	L.lentus MT858376	L.lentus MN190746
33	Poland: Pogórze Wielickie	Myślenice 49.79727, 19.96507	Liophloeodes	none	none	L.lentus MN190747
34	Romania: Muntii Vladeasa (Apuseni)	Rachicele 46.71528, 22.89112	L. gibbus	none	L.gibbus MT858377	none
35	Romania: Muntii Vladeasa (Apuseni)	Rachicele 46.71528, 22.89112	L. gibbus	none	none	none
36	Romania: Muntii Vladeasa (Apuseni)	Rachicele 46.71528, 22.89112	L. gibbus	none	L.gibbus MT858378	L.gibbus MN190748
37	Romania: Muntii Vladeasa (Apuseni)	Rachicele 46.71528, 22.89112	L. gibbus	none	L.gibbus MT858379	L.gibbus MN190749
39	Romania: Transylvanian Plateau	Cluj-Napoca - botanical garden 46.7603, 23.5867	L. liptoviensis	none	L.liptoviensis MT858380	L.liptoviensis MN190750
40	Romania: Transylvanian Plateau	Cluj-Napoca - botanical garden 46.7603, 23.5867	Liophloeodes	none	L.liptoviensis MT858381	L.liptoviensis MN190751
41	Romania: Muntii Vladeasa (Apuseni)	Rachicele 46.71528, 22.89112	L. gibbus	none	none	none
42	Romania: Muntii Vladeasa (Apuseni)	Rachicele 46.71528, 22.89112	L. gibbus	none	none	none
43	Romania: Muntii Vladeasa (Apuseni)	Rachicele 46.71528, 22.89112	L. gibbus	none	none	L.liptoviensis MN190752
44	Romania: Transylvanian Plateau	Cheile Turzii 46.55899, 23.69155	L. liptoviensis	none	L.liptoviensis MT858382	L.liptoviensis MN190753
45	Romania: Transylvanian Plateau	Cheile Turzii 46.55899, 23.69155	L. liptoviensis	none	none	L.liptoviensis MN190754
46	Romania: Transylvanian Plateau	Cheile Turzii 46.55899, 23.69155	L. liptoviensis	none	L.liptoviensis MT858383	L.liptoviensis MN190755
47	Romania: Transylvanian Plateau	Cluj Napoca (Parc Iuliu Hatieganu) 46.76633, 23.56199	L. gibbus	none	none	none : MN190758
53	Poland: Gorce	Ochotnica 49.51817, 20.32195	L. lentus	none	L.gibbus MT858384	L.lentus MN190756
54	Poland: Gorce	Ochotnica 49.51817, 20.32195	L. lentus	none	none	L.lentus MN190757
55	Poland: Gorce	Ochotnica 49.51817, 20.32195	L. lentus	none	L.gibbus MT858385	L.lentus
56	Poland: Gorce	Ochotnica 49.51817, 20.32195	L. lentus	none	none	L.lentus MN190759
58	Poland: Gorce	Rzeki 49.59036, 20.23057	L. lentus	none	none	L.lentus MN190760
59	Poland: Gorce	Rzeki 49.59036, 20.23057	L. lentus	none	L.gibbus MT858386	L.lentus MN190761
60	Poland: Gorce	Rzeki 49.59036, 20.23057	L. lentus	none	none	none
61	Poland: Pieniny	Sromowce Wyżne 49.40799, 20.33907	L. lentus	none	L.gibbus MT858387	none
62	Poland: Pieniny	Sromowce Wyżne 49.40799, 20.33907	L. lentus	none	L.gibbus MT858388	L.lentus MN190762
63	Poland: Pieniny	Sromowce Wyżne 49.40799, 20.33907	L. lentus	none	L.gibbus MT858389	none
64	Poland: Pieniny	Sromowce Wyżne 49.40799, 20.33907	L. lentus	none	L.gibbus MT858390	L.lentus MN190763
65	Poland: Pieniny	Sromowce Wyżne 49.40799, 20.33907	L. lentus	none	L.gibbus MT858391	none
66	Poland: Pieniny	Szczawnica 49.42612, 20.44915	L. lentus	none	none	L.lentus MN190764
67	Poland: Pieniny	Szczawnica 49.42612, 20.44915	L. lentus	none	L.gibbus MT858392	L.lentus MN190765
68	Poland: Pieniny	Szczawnica-Orlica 49.41921, 20.45811	L. gibbus	none	none	L.gibbus MN190766
69	Poland: Pieniny	Szczawnica-Orlica 49.41921, 20.45811	L. gibbus	none	none	L.gibbus MN190767
70	Poland: Beskid Niski	Zdynia 49.48386, 21.27601	L. gibbus	none	L.gibbus MT858393	L.gibbus MN190768
71	Poland: Beskid Niski	Zdynia 49.48386, 21.27601	L. gibbus	none	L.gibbus MT858394	L.gibbus MN190769
72	Poland: Beskid Niski	Zdynia 49.48386, 21.27601	L. gibbus	none	L.gibbus MT858395	L.gibbus MN190770
73	Poland: Beskid Niski	Zdynia 49.48386, 21.27601	L. gibbus	none	L.gibbus MT858396	L.gibbus MN190771
74	Poland: Beskid Niski	Zdynia 49.48386, 21.27601	L. gibbus	none	none	L.gibbus MN190772
75	Poland: Beskid Niski	Radocyna 49.44764, 21.36896	L. gibbus	none	L.gibbus MT858397	L.gibbus MN190773
76	Poland: Beskid Niski	Radocyna 49.44764, 21.36896	L. gibbus	none	L.gibbus MT858398	L.gibbus MN190774
77	Poland: Beskid Niski	Radocyna 49.44764, 21.36896	L. gibbus	none	none	none
78	Poland: Beskid Niski	Radocyna 49.44764, 21.36896	L. gibbus	none	none	L.gibbus MN190775
79	Poland: Beskid Niski	Radocyna 49.44764, 21.36896	L. gibbus	none	none	none
80	Poland: Beskid Niski	Wyszowatka near Grab 49.4467, 21.43432	L. gibbus	none	none	L.gibbus MN190776
81	Poland: Beskid Niski	Wyszowatka near Grab 49.4467, 21.43432	L. gibbus	none	none MT858399	L.gibbus MN190777
82	Poland: Beskid Niski	Wyszowatka near Grab 49.4467, 21.43432	L. gibbus	none	none	L.gibbus MN190778
83	Poland: Beskid Niski	Wyszowatka near Grab 49.4467, 21.43432	L. gibbus	none	none	L.gibbus MN190779
84	Slovakia: Nizke Tatry	Korytnica Kupele 48.88987, 19.285	L. lentus	none	L.lentus MT858400	L.lentus MN190780
85	Slovakia: Nizke Tatry	Korytnica Kupele 48.88987, 19.285	L. lentus	none	L.lentus MT858401	L.lentus MN190781
87	Slovakia: Nizke Tatry	Korytnica Kupele 48.88987, 19.285	L. lentus	none	L.lentus MT858402	L.lentus MN190782
88	Slovakia: Nizke Tatry	Korytnica Kupele 48.88987, 19.285	L. lentus	none	L.lentus MT858403	L.lentus MN190783
91	Slovakia: Breznianska kotlina	Brezno 48.81809, 19.69866	L. liptoviensis	none	L.lentus MT858404	L.liptoviensis MN190784
92	Slovakia: Breznianska kotlina	Brezno 48.81809, 19.69866	L. liptoviensis	none	none	L.liptoviensis MN190785
93	Slovakia: Breznianska kotlina	Brezno 48.81809, 19.69866	L. liptoviensis	none	none	none
94	Slovakia: Breznianska kotlina	Brezno 48.81809, 19.69866	L. liptoviensis	none	none	L.liptoviensis MN190786
95	Slovakia: Breznianska kotlina	Brezno 48.81809, 19.69866	L. liptoviensis	none	none	none
96	Slovakia: Breznianska kotlina	Brezno 48.81809, 19.69866	L. liptoviensis	none	none	L.liptoviensis MN190787
97	Slovakia: Breznianska kotlina	Brezno 48.81809, 19.69866	L. liptoviensis	none	L.lentus MT858405	L.liptoviensis MN190788
98	Poland: Beskid Żywiecki	Żywiec 49.69129, 19.18239	Liophloeodes	none	L.gibbus MT858406	L.lentus MN190789
99	Poland: Beskid Wyspowy	Młyczyńska 49.62618, 20.40922	L. lentus	none	L.gibbus MT858407	L.lentus MN190790
100	Poland: Beskid Wyspowy	Młyczyńska 49.62618, 20.40922	L. lentus	none	none	L.lentus MN190791
101	Poland: Beskid Wyspowy	Młyczyńska 49.62618, 20.40922	L. lentus	none	none	L.lentus MN190792
102	Poland: Beskid Wyspowy	Łętowe 49.65135, 20.15822	Liophloeodes	none	none	L.lentus MN190793
103	Romania: Muntii Vladeasa (Apuseni)	Rachicele 46.71528, 22.89112	L. gibbus	none	L.gibbus MT858408	L.gibbus MN190794
105	Slovakia: Nizke Tatry	Trnovo 49.02458, 18.83725	L. tessulatus	none	L.tessulatus MT858409	L.tessulatus MN190795
106	Poland: Beskid Niski	Krempna 49.51097, 21.50041	L. gibbus	none	L.gibbus MT858410	L.gibbus MN190796
107	Poland: Beskid Żywiecki	Juszczyn 49.69304, 19.69165	L. tessulatus	L.tessulatus MN191040	L.tessulatus MT858411	L.tessulatus MN190797
108	Romania: Transylvanian Plateau	Cheile Turzii 46.5636, 23.68595	L. liptoviensis	L.liptoviensis MN191041	L.liptoviensis MT858412	L.liptoviensis MN190798
109	Austria: Steirisch-niederösterreichische Kalkalpen	Sommeralm 47.35118, 15.51792	L. lentus	none	L.lentus MT858413	none
110	Austria: Steirisch-niederösterreichische Kalkalpen	Sommeralm 47.35118, 15.51792	L. lentus	L. lentus MN191042	L.lentus MT858414	L.lentus MN190799
111	Austria: Steirisch-niederösterreichische Kalkalpen	Sommeralm 47.35118, 15.51792	L. lentus	L.lentus MN191175	L.lentus MT858415	L.lentus MN190800
112	Slovenia: Labotniške Alpe	Javnik 46.58594, 15.37156	Liophloeodes	none	L.lentus MT858416	none
113	Poland: Beskid Wyspowy	Jastrzębiec 49.71528, 20.17986	Liophloeodes	none	L.gibbus MT858417	L.gibbus MN190801
114	Poland: Bieszczady	Wołosate 49.06731, 22.67973	L. gibbus	L. gibbus MN191044	L.liptoviensis MT858418	none
115	Poland: Bieszczady	Wołosate 49.06731, 22.67973	L. gibbus	none	L.liptoviensis MT858419	none
116	Poland: Pieniny	Szczawnica-Orlica 49.41921, 20.45811	L. gibbus	none	L.gibbus MT858420	none
117	Poland: Beskid Sądecki	Wierchomla Wielka 49.42655, 20.79119	L. lentus	L.lentus MN191177	L.gibbus MT858421	none
118	Poland: Beskid Sądecki	Wierchomla Wielka 49.42655, 20.79119	L. tessulatus	none	L.tessulatus MT858422	none
120	Poland: Beskid Żywiecki	Juszczyn 49.69304, 19.69165	Liophloeodes	none	L.gibbus MT858423	none
121	Poland: Beskid Żywiecki	Zawoja 49.66808, 19.58211	Liophloeodes	none	L.gibbus MT858424	L.lentus MN190802
122	Slovakia: Nizke Tatry	Korytnica Kupele 48.88987, 19.285	L. lentus	none	L.lentus MT858425	L.lentus MN190803
123	Slovakia: Nizke Tatry	Korytnica Kupele 48.88987, 19.285	L. lentus	L.lentus MN191045	L.lentus MT858426	L.lentus MN190804
124	Slovakia: Nizke Tatry	Korytnica Kupele 48.88987, 19.285	L. lentus	L.lentus MN191046	L.lentus MT858427	L.lentus MN190805
125	Slovakia: Nizke Tatry	Korytnica Kupele 48.88987, 19.285	L. lentus	L.lentus MN191047	L.lentus MT858428	none
126	Slovakia: Nizke Tatry	Liptovska Luzna 48.94174, 19.31981	Liophloeodes	L.lentus MN191048	L.lentus MT858429	L.lentus MN190806
128	Slovakia: Nizke Tatry	Liptovska Luzna 48.94174, 19.31981	Liophloeodes	none	L.lentus MT858430	L.lentus MN190807
129	Slovakia: Nizke Tatry	Liptovska Luzna 48.94174, 19.31981	Liophloeodes	L.lentus MN191049	L.lentus MT858431	L.lentus MN190808
130	Slovakia: Nizke Tatry	Liptovska Luzna 48.94174, 19.31981	Liophloeodes	L.lentus MN191050	L.lentus MT858432	L.lentus MN190809
132	Poland: Bieszczady	Tarnica 49.07455, 22.72623	Liophloeodes	L.gibbus MN191051	L.gibbus MT858433	L.gibbus MN190810
133	Poland: Tatry Zachodnie	Dolina Strążyska	L. lentus	none	L.gibbus MT858434	none
134	Poland: Gorce	Dolina Gorcowego Potoku 49.58575, 20.22321	L. lentus	none	L.gibbus MT858435	none
135	Poland: Tatry Zachodnie	Adamica 49.23333, 19.91665	L. lentus	L.lentus MN191052	none	L.lentus MN190811
136	Poland: Tatry Zachodnie	Adamica 49.23333, 19.91665	L. lentus	none	L.gibbus MT858436	L.lentus MN190812
137	Poland: Silesian Upland	Jaworzno 50.20498, 19.27393	Liophloeodes	none	L.gibbus MT858437	L.gibbus MN190813
138	Poland: Silesian Upland	Jaworzno 50.20498, 19.27393	Liophloeodes	L.gibbus MN191053	L.gibbus MT858438	none
139	Poland: Beskid Niski	Radocyna 49.44764, 21.36896	L. tessulatus	none	L.tessulatus MT858439	L.tessulatus MN190814
140	Poland: Tatry Zachodnie	Piec 49.24767, 19.88692	Liophloeodes	L.lentus MN191054	L.gibbus MT858440	none
141	Slovenia: Labotniške Alpe	Javnik 46.59111, 15.36712	Liophloeodes	none	L.lentus MT858441	none
142	Slovenia: Labotniške Alpe	Javnik 46.59111, 15.36712	Liophloeodes	none	L.lentus MT858442	none
143	Slovenia: Labotniške Alpe	Javnik 46.59111, 15.36712	Liophloeodes	none	L.lentus MT858443	L.lentus MN190815
144	Slovenia: Labotniške Alpe	Javnik 46.59111, 15.36712	Liophloeodes	none	L.lentus MT858444	L.lentus MN190816
145	Slovenia: Labotniške Alpe	Javnik 46.59111, 15.36712	Liophloeodes	none	L.lentus MT858445	none
146	Slovenia: Labotniške Alpe	Javnik 46.59111, 15.36712	Liophloeodes	none	L.lentus MT858446	L.lentus MN190817
147	Poland: Beskid Niski	Wyszowatka 49.45277, 21.42152	L. gibbus	L.gibbus MN191055	L.gibbus MT858447	L.gibbus MN190818
148	Poland: Beskid Niski	Zdynia 49.48386, 21.27601	L. gibbus	none	L.gibbus MT858448	none
149	Poland: Beskid Niski	Zdynia 49.48386, 21.27601	L. gibbus	L.gibbus MN191056	L.gibbus MT858449	none
150	Poland: Masyw Śnieżnika	Kletno 50.25575, 16.85606	L. lentus	L.lentus MN191057	L.lentus MT858450	L.lentus MN190819
151	Poland: Masyw Śnieżnika	Kletno 50.25575, 16.85606	L. lentus	none	L.gibbus MT858451	L.lentus MN190820
152	Poland: Masyw Śnieżnika	Kletno 50.25575, 16.85606	L. lentus	none	L.gibbus MT858452	L.lentus MN190821
153	Poland: Masyw Śnieżnika	Kletno 50.25575, 16.85606	L. lentus	none	L.gibbus MT858453	none
154	Poland: Masyw Śnieżnika	Kletno 50.25575, 16.85606	L. lentus	none	L.gibbus MT858454	L.lentus MN190822
155	Poland: Beskid Makowski	Krzczonów 49.7375, 19.92597	Liophloeodes	none	L.gibbus MT858455	none
157	Poland: Beskid Niski	Barwinek 49.43246, 21.68799	L. gibbus	none	L.gibbus MT858456	L.gibbus MN190823
158	Poland: Beskid Niski	Barwinek 49.43246, 21.68799	L. gibbus	none	L.gibbus MT858457	L.gibbus MN190824
160	Poland: Masyw Śnieżnika	Śnieżnik 50.20752, 16.84708	L. lentus	L.lentus MN191058	L.gibbus MT858458	L.lentus MN190825
161	Poland: Masyw Śnieżnika	Śnieżnik 50.20752, 16.84708	L. lentus	none	L.gibbus MT858459	L.lentus MN190826
162	Poland: Masyw Śnieżnika	Śnieżnik 50.20752, 16.84708	L. lentus	none	L.gibbus MT858460	L.lentus MN190827
163	Poland: Beskid Wyspowy	Łętowe 49.65135, 20.15822	Liophloeodes	none	L.gibbus MT858461	none
164	Slovenia: Karavanke	Dovje 46.46783, 13.94802	L. tessulatus	none	L.tessulatus MT858462	L.tessulatus MN190828
165	Slovenia: Karavanke	Dovje 46.46783, 13.94802	Liophloeodes	L.liptoviensis MN191059	L.liptoviensis MT858463	none
166	Slovenia: Karavanke	Dovje 46.46783, 13.94802	Liophloeodes	L.liptoviensis	L.liptoviensis MT858464	none
167	Slovenia: Karavanke	Dovje 46.46783, 13.94802	Liophloeodes	none	none	none
168	Slovenia: Karavanke	Dovje 46.46783, 13.94802	Liophloeodes	L.liptoviensis MN191060	L.lentus MT858465	L.liptoviensis MN190829
169	Slovenia: Karavanke	Dovje 46.46783, 13.94802	Liophloeodes	none	none	L.liptoviensis MN190830
170	Slovakia: Veľká Fatra	Turecka 48.84851, 19.08778	L. lentus	none	L.lentus MT858466	none
171	Slovakia: Veľká Fatra	Turecka 48.84851, 19.08778	L. lentus	none	L.lentus MT858467	L.lentus MN190831
172	Poland: Masyw Śnieżnika	Śnieżnik 50.20752, 16.84708	L. lentus	L. lentus MN191061	L.gibbus MT858468	L.lentus MN190832
173	Poland: Masyw Śnieżnika	Śnieżnik 50.20752, 16.84708	L. lentus	L.lentus MN191062	L.gibbus MT858469	L.lentus MN190833
174	Poland: Masyw Śnieżnika	Śnieżnik 50.20752, 16.84708	L. lentus	L.lentus MN191063	L.gibbus MT858470	L.lentus MN190834
175	Poland: Beskid Niski	stream near Bednarskie 49.66782, 21.3388	L. gibbus	none	L.gibbus MT858471	L.gibbus MN190835
176	Poland: Beskid Niski	Ożenna 49.42581, 21.45569	L. gibbus	none	L.gibbus MT858472	L.gibbus MN190836
177	Poland: Beskid Niski	Ożenna 49.42581, 21.45569	L. gibbus	L. gibbus MN191064	L.gibbus MT858473	L.gibbus MN190837
178	Romania: Muntii Vladeasa (Apuseni)	Rachicele 46.71528, 22.89112	L. gibbus	none	L.gibbus MT858474	none
179	Romania: Muntii Vladeasa (Apuseni)	Rachicele 46.71528, 22.89112	L. gibbus	none	L.gibbus MT858475	L.gibbus MN190838
180	Romania: Muntii Vladeasa (Apuseni)	Rachicele 46.71528, 22.89112	L. gibbus	L.gibbus MN191066	L.gibbus MT858476	L.gibbus MN190839
181	Romania: Transylvanian Plateau	Cluj Napoca - Parc Iuliu Hatieganu 46.76633, 23.56199	L. gibbus	L.gibbus MN191067	L.gibbus MT858477	L.gibbus MN190840
182	Romania: Transylvanian Plateau	Cluj-Napoca - botanical garden 46.7603, 23.5867	Liophloeodes	none	L.gibbus MT858478	none
183	Romania: Transylvanian Plateau	Cluj-Napoca - botanical garden 46.7603, 23.5867	Liophloeodes	none	L.gibbus MT858479	L.gibbus MN190841
185	Poland: Pogórze Dynowskie	Nienadowa 49.81581, 22.42606	L. gibbus	L.gibbus MN191067	L.gibbus MT858480	L.gibbus MN190842
186	Poland: Pogórze Dynowskie	Nienadowa 49.81581, 22.42606	L. gibbus	L.gibbus MN191069	L.gibbus MT858481	L.gibbus MN190843
187	Poland: Pogórze Dynowskie	Nienadowa 49.81581, 22.42606	L. gibbus	L.gibbus MN191041	L.gibbus MT858482	L.gibbus MN190844
188	Poland: Pogórze Przemyskie	Iskań 49.7776, 22.46908	L. gibbus	L.gibbus MN191071	L.gibbus MT858483	L.gibbus MN190845
189	Poland: Pogórze Przemyskie	Iskań 49.7776, 22.46908	L. gibbus	L.gibbus MN191072	L.gibbus MT858484	L.gibbus MN190846
190	Poland: Pogórze Przemyskie	Iskań 49.7776, 22.46908	L. gibbus	L.gibbus MN191073	L.gibbus MT858485	L.gibbus MN190847
191	Poland: Pogórze Przemyskie	Wola Korzeniecka 49.67565, 22.50175	L. gibbus	L.gibbus MN191074	none	L.gibbus MN190848
192	Poland: Pogórze Przemyskie	Wola Korzeniecka 49.67565, 22.50175	L. gibbus	L.gibbus MN191075	L.gibbus MT858486	L.gibbus MN190849
193	Poland: Pogórze Przemyskie	Wola Korzeniecka 49.67565, 22.50175	L. gibbus	none	L.gibbus MT858487	L.gibbus MN190850
194	Poland: Pogórze Przemyskie	Wola Korzeniecka 49.67565, 22.50175	L. gibbus	none	none	none
195	Poland: Pogórze Przemyskie	Łodzinka Dolna 49.66515, 22.56954	L. gibbus	L.gibbus MN191076	L.gibbus MT858488	L.gibbus MN190851
196	Poland: Pogórze Przemyskie	Łodzinka Dolna 49.66515, 22.56954	L. gibbus	L.gibbus MN191077	L.gibbus MT858489	L.gibbus MN190852
197	Poland: Pogórze Przemyskie	Łodzinka Dolna 49.66515, 22.56954	L. gibbus	L.gibbus MN191078	L.gibbus MT858490	L.gibbus MN190853
198	Poland: Pogórze Przemyskie	Łodzinka Dolna 49.66515, 22.56954	L. gibbus	L.gibbus	none	none
199	Poland: Pogórze Przemyskie	Łodzinka Dolna 49.66515, 22.56954	L. gibbus	L.gibbus MN191079	L.gibbus MT858491	L.gibbus MN190854
200	Poland: Góry Sanocko-Turczańskie	Leszczyny 49.61613, 22.68531	L. liptoviensis	none	L.liptoviensis MT858492	L.liptoviensis MN190855
201	Poland: Góry Sanocko-Turczańskie	Leszczyny 49.61613, 22.68531	L. liptoviensis	L.liptoviensis MN191080	L.liptoviensis MT858493	L.liptoviensis MN190856
202	Poland: Góry Sanocko-Turczańskie	Leszczyny 49.61613, 22.68531	L. liptoviensis	none	L.liptoviensis MT858494	L.liptoviensis MN190857
203	Poland: Góry Sanocko-Turczańskie	Arłamów 49.62365, 22.62598	L. liptoviensis	L.liptoviensis MN191081	L.liptoviensis MT858495	L.liptoviensis MN190858
204	Poland: Góry Sanocko-Turczańskie	Arłamów 49.62365, 22.62598	L. gibbus	L.gibbus MN191082	L.gibbus MT858496	L.gibbus MN190859
205	Poland: Góry Sanocko-Turczańskie	Arłamów 49.62365, 22.62598	L. gibbus	L.gibbus MN191083	L.gibbus MT858497	L.gibbus MN190860
207	Poland: Bieszczady	Chodak 49.2853, 22.6819	L. gibbus	L.gibbus MN191084	L.gibbus MT858498	L.gibbus MN190861
208	Poland: Bieszczady	Chodak 49.2853, 22.6819	L. gibbus	L.gibbus MN191085	L.gibbus MT858499	none
209	Poland: Bieszczady	Chodak 49.2853, 22.6819	L. gibbus	none	L.gibbus MT858500	L.gibbus MN190862
210	Poland: Bieszczady	Sakowczyk 49.31476, 22.45736	L. gibbus	none	L.gibbus MT858501	L.gibbus MN190863
211	Poland: Bieszczady	Sakowczyk 49.31476, 22.45736	L. liptoviensis	L.liptoviensis MN191086	L.gibbus MT858502	L.liptoviensis MN190864
212	Poland: Bieszczady	Sakowczyk 49.31476, 22.45736	Liophloeodes	none	L.liptoviensis MT858503	none
213	Poland: Bieszczady	Hoczew 49.42078, 22.33036	L. liptoviensis	L.liptoviensis MN191087	L.liptoviensis MT858504	L.liptoviensis MN190865
214	Poland: Bieszczady	Hoczew 49.42078, 22.33036	L. liptoviensis	L.liptoviensis MN191070	L.liptoviensis MT858505	L.liptoviensis MN190866
215	Poland: Bieszczady	Hoczew 49.42078, 22.33036	L. liptoviensis	none	L.liptoviensis MT858506	none
216	Poland: Bieszczady	Hoczew 49.42078, 22.33036	L. liptoviensis	L.liptoviensis MN191089	none	L.liptoviensis MN190867
217	Poland: Beskid Niski	Komańcza 49.33946, 22.04293	L. gibbus	L.gibbus MN191090	L.gibbus MT858507	L.gibbus MN190868
219	Poland: Beskid Niski	Daliowa 49.45668, 21.77181	L. gibbus	none	none	L.gibbus MN190869
220	Slovakia: Ondavská vrchovina	Ladomirová 49.337, 21.63549	L. gibbus	none	L.gibbus MT858508	L.gibbus MN190870
221	Slovakia: Ondavská vrchovina	Ladomirová 49.337, 21.63549	L. gibbus	L.gibbus MN191091	L.gibbus MT858509	L.gibbus MN190871
222	Slovakia: Ondavská vrchovina	Ladomirová 49.337, 21.63549	L. gibbus	none	L.gibbus MT858510	L.gibbus MN190872
223	Slovakia: Ondavská vrchovina	Bardejov 49.32308, 21.28373	L.gibbus	none	none	L.gibbus MN190873
224	Slovakia: Ondavská vrchovina	Bardejov 49.32308, 21.28373	L.gibbus	none	L.gibbus MT858511	L.gibbus MN190874
225	Slovakia: Ondavská vrchovina	Bardejov 49.32308, 21.28373	L.gibbus	none	L.gibbus MT858512	L.gibbus MN190875
226	Poland: Beskid Niski	Tylicz 49.39611, 21.02885	L.gibbus	none	L.gibbus MT858513	L.gibbus MN190876
227	Poland: Beskid Niski	Tylicz 49.39611, 21.02885	L.gibbus	none	L.gibbus MT858514	L.gibbus MN190877
228	Poland: Beskid Sądecki	Andrzejówka 49.34871, 20.81159	L.gibbus	L.gibbus MN191092	L.gibbus MT858515	L.gibbus MN190878
229	Poland: Beskid Sądecki	Andrzejówka 49.34871, 20.81159	L.gibbus	none	L.gibbus MT858516	L.gibbus MN190879
230	Poland: Beskid Sądecki	Rytro 49.50085, 20.67743	L.gibbus	L.gibbus MN191093	L.gibbus MT858517	L.gibbus MN190880
231	Poland: Beskid Sądecki	Rytro 49.50085, 20.67743	L.gibbus	L.gibbus MN191094	L.gibbus MT858518	L.gibbus MN190881
232	Poland: Gorce	Ochotnica Dolna 49.52069, 20.37917	L.gibbus	L.gibbus MN191095	L.gibbus MT858519	L.gibbus MN190882
233	Poland: Gorce	Ochotnica Dolna 49.52069, 20.37917	L.gibbus	none	L.gibbus MT858520	L.gibbus MN190883
234	Poland: Gorce	Ochotnica Dolna 49.52069, 20.37917	L.gibbus	L.gibbus MN191096	L.gibbus MT858521	L.gibbus MN190884
235	Poland: Pieniny	Biała Woda 49.40803, 20.55711	L.gibbus	L.gibbus MN191097	L.gibbus MT858522	L.gibbus MN190885
236	Serbia: Fruška gora	Rakovac 45.19186, 19.77073	L.lentus	none	L.lentus MT858523	none
237	Serbia: Fruška gora	Rakovac 45.18372, 19.76862	L.lentus	L.lentus MN191098	L.lentus MT858524	L.lentus MN190886
238	Serbia: Fruška gora	Rakovac 46.18372, 19.76862	L.lentus	L.lentus MN191099	L.lentus MT858525	L.lentus MN190887
239	Serbia: Fruška gora	Rakovac 47.18372, 19.76862	L.lentus	L.lentus MN191100	L.lentus MT858526	L.lentus MN190888
240	Serbia: Fruška gora	Rakovac 48.18372, 19.76862	L.lentus	L.lentus MN191101	L.lentus MT858527	L.lentus MN190889
241	Serbia: Fruška gora	Rakovac 49.18372, 19.76862	L.lentus	L.lentus MN191102	L.lentus MT858528	none
242	Serbia: Fruška gora	Rakovac 45.17351, 19.88822	Liophloeodes	L.lentus MN191103	L.lentus MT858529	L.lentus MN190890
244	Serbia: Pannonian Basin	Medna 43.96103, 20.95039	Liophloeodes	L. pupillatus MN191104	none	L.pupillatus MN190891
245	Serbia: Vlasina	Crna Trava 42.8462, 22.29065	L.lentus	L.lentus MN191105	L.gibbus MT858530	L.lentus MN190892
246	Serbia: Vlasina	Crna Trava 42.8462, 22.29065	L.lentus	L.lentus MN191106	L.gibbus MT858531	L.lentus MN190893
248	Serbia: Stari Vlah	Lisa 43.63411, 20.24936	L.lentus	L.lentus MN191107	L.gibbus MT858532	none
249	Serbia: Stari Vlah	Lisa 43.63411, 20.24936	L.lentus	L.lentus MN191108	L.gibbus MT858533	L.lentus MN190894
250	Bulgaria: Witosza	Vladaya 42.61376, 23.20214	L.lentus	L.lentus MN191109	L.gibbus MT858534	L.lentus MN190895
251	Bosnia and Herzegovina: Rakitnica valley (Dinaric Alps)	Rogatica 43.78756, 19.01091	L.pupillatus	L.pupillatus MN191110	L.liptoviensis MT858535	none
252	Bosnia and Herzegovina: Rakitnica valley (Dinaric Alps)	Rogatica 43.78756, 19.01091	L.pupillatus	L.pupillatus MN191111	none	L.pupillatus MN190896
253	Bosnia and Herzegovina: Rakitnica valley (Dinaric Alps)	Rogatica 43.78756, 19.01091	L.pupillatus	L.pupillatus MN191112	none	none
254	Bosnia and Herzegovina: Rakitnica valley (Dinaric Alps)	Rogatica 43.78756, 19.01091	L.pupillatus	L.pupillatus MN191113	none	none
255	Bosnia and Herzegovina: near Sarajevo	Srednje 43.98658, 18.41698	Liophloeodes	L.pupillatus MN191114	L.liptoviensis MT858536	L.pupillatus MN190897
256	Bosnia: Kirvaja valley (Dinaric Alps)	Skroze 44.43556, 18.17751	L.lentus	L.lentus MN191115	L.gibbus MT858537	L.lentus MN190898
258	Bosnia: Kirvaja valley (Dinaric Alps)	Skroze 44.43556, 18.17751	L.lentus	L.lentus MN191116	L.gibbus MT858538	L.lentus MN190899
259	Romania: Muntii Padurea Craiului (Apuseni)	Vadu Crisulul 46.97473, 22.50783	L.liptoviensis	L.liptoviensis MN191117	L.liptoviensis MT858539	L.liptoviensis MN190900
260	Romania: Muntii Vladeasa (Apuseni)	Garda Seaca 46.47946, 22.79841	L.gibbus	L.gibbus MN191118	L.gibbus MT858540	L.gibbus MN190901
261	Romania: Muntii Vladeasa (Apuseni)	Garda Seaca 46.47946, 22.79841	Liophloeodes	L.gibbus MN191119	L.gibbus MT858541	L.gibbus MN190902
262	Romania: Muntii Vladeasa (Apuseni)	Garda Seaca 46.47946, 22.79841	L.liptoviensis	L.liptoviensis MN191120	L.liptoviensis MT858542	L.liptoviensis MN190903
263	Romania: Transylvanian Plateau	Cluj-Napoca - botanical garden 46.7603, 23.5867	Liophloeodes	L.liptoviensis MN191121	none	L.liptoviensis MN190904
264	Romania: Transylvanian Plateau	Cluj-Napoca - botanical garden 46.7603, 23.5867	Liophloeodes	L. lentus MN191187	none	L.liptoviensis MN190905
265	Romania: Transylvanian Plateau	Cluj-Napoca - botanical garden 46.7603, 23.5867	L.liptoviensis	none	none	L.liptoviensis MN190906
266	Romania: Transylvanian Plateau	Cheile Turzi 46.5636, 23.68595	L.liptoviensis	none	L.liptoviensis MT858543	none
267	Romania: Transylvanian Plateau	Cheile Turzi 46.5636, 23.68595	L.liptoviensis	L.liptoviensis MN191123	L.liptoviensis MT858544	L.liptoviensis MN190907
268	Romania: Transylvanian Plateau	Cheile Turzi 46.5636, 23.68595	L.liptoviensis	L.liptoviensis MN191124	L.liptoviensis MT858545	L.liptoviensis MN190908
269	Romania: Munții Rodnei/Munţii Călimani	Sarata 47.07294, 24.43667	Liophloeodes	none	L.liptoviensis MT858546	L.liptoviensis MN190909
270	Romania: Munţii Călimani	Colibita 47.17755, 24.91343	Liophloeodes	L.liptoviensis MN191125	L.liptoviensis MT858547	L.liptoviensis MN190910
271	Romania: Depresiunea Ciuc	Sandominic 46.60206, 25.80358	L.herbstii	none	L.liptoviensis MT858548	L.herbstii MN190911
272	Romania: Munții Perșani	Hoghiz 45.94911, 25.36869	L.herbstii	none	none	L.herbstii MN190912
273	Romania: Munții Bucegi	Paraul Rece 45.52158, 25.50734	Liophloeodes	L.herbstii MN191126	L.gibbus MT858549	L.herbstii MN190913
274	Romania: Munții Bucegi	Azuga 45.4421, 25.55461	L.herbstii	none	L.gibbus MT858550	L.herbstii MN190914
275	Romania: Munții Bucegi	Azuga 45.4421, 25.55461	L.herbstii	none	L.gibbus MT858551	L.herbstii MN190915
276	Romania: Munții Bucegi	Azuga 49.2853, 22.6819	L.herbstii	L.herbstii MN191127	L.herbstii MT858552	L.herbstii MN190916
277	Poland: Bieszczady	Chodak 49.2853, 22.6819	L.gibbus	L.gibbus MN191128	L.gibbus MT858553	L.gibbus MN190917
278	Poland: Bieszczady	Chodak 49.2853, 22.6819	L.gibbus	none	L.gibbus MT858554	L.gibbus MN190918
279	Poland: Bieszczady	Lutowiska 49.24205, 22.69823	L.liptoviensis	L.liptoviensis MN191129	L.liptoviensis MT858555	L.liptoviensis MN190919
280	Poland: Bieszczady	Lutowiska 49.24205, 22.69823	L.liptoviensis	L.liptoviensis MN191130	L.liptoviensis MT858556	L.liptoviensis MN190920
281	Poland: Bieszczady	Stuposiany 49.17716, 22.66084	L.liptoviensis	L.liptoviensis MN191131	L.gibbus MT858557	L.liptoviensis MN190921
282	Poland: Bieszczady	Stuposiany 49.17716, 22.66084	Liophloeodes	none	none	L.gibbus MN190922
283	Poland: Bieszczady	Stuposiany 49.17716, 22.66084	L.liptoviensis	none	none	none
284	Poland: Bieszczady	Ustrzyki Górne 49.11871, 22.66416	L.liptoviensis	L.liptoviensis MN191132	L.liptoviensis MT858558	L.liptoviensis MN190923
285	Poland: Bieszczady	Wołosate 49.07656, 22.66556	L.liptoviensis	L.liptoviensis MN191133	none	L.liptoviensis MN190924
286	Poland: Beskid Niski	Rozdziele 49.64028, 21.28975	L.gibbus	L.gibbus MN191134	L.gibbus MT858559	L.gibbus MN190925
287	Poland: Beskid Niski	Rozdziele 49.64028, 21.28975	L.gibbus	L.gibbus MN191135	L.gibbus MT858560	none
288	Poland: Beskid Niski	Rozdziele 49.64028, 21.28975	L.gibbus	L.gibbus MN191136	none	L.gibbus MN190926
289	Poland: Beskid Niski	Rozdziele 49.64028, 21.28975	L.gibbus	L.gibbus MN191137	none	none
290	Poland: Beskid Niski	Rozdziele 49.64028, 21.28975	L.gibbus	none	none	none
291	Poland: Beskid Niski	Wola Cieklińska 49.63656, 21.3618	L.gibbus	none	L.gibbus MT858561	none
292	Poland: Beskid Niski	Wola Cieklińska (Cieklin) 49.65463, 21.41246	Liophloeodes	none	L.gibbus MT858562	L.gibbus MN190927
293	Poland: Beskid Niski	Krempna near Huta Krempska 49.50013, 21.49028	L.gibbus	L.gibbus MN191138	L.gibbus MT858563	L.gibbus MN190928
294	Poland: Beskid Niski	Krempna near Huta Krempska 49.50013, 21.49028	L.gibbus	none	L.gibbus MT858564	L.gibbus MN190929
295	Poland: Beskid Niski	Czarne (Wyszowatka) 49.4717, 21.37823	L.gibbus	L.gibbus MN191139	L.gibbus MT858565	L.gibbus MN190930
296	Poland: Beskid Niski	Czarne (Wyszowatka) 49.4717, 21.37823	L.gibbus	L.gibbus MN191140	L.gibbus MT858566	L.gibbus MN190931
297	Slovakia: Popradská kotlina	Lendak 49.2217, 20.32936	L.gibbus	L.gibbus MN191141	L.gibbus MT858567	L.gibbus MN190932
298	Slovakia: Popradská kotlina	Lendak 49.2217, 20.32936	L.gibbus	L.gibbus MN191142	L.gibbus MT858568	L.gibbus MN190933
299	Slovakia: Popradská kotlina	Lendak 49.2217, 20.32936	L.gibbus	L.gibbus MN191143	none	L.gibbus MN190934
300	Slovakia: Belianske Tatry	Podspady 49.2759, 20.18796	L.lentus	L.lentus MN191144	L.gibbus MT858569	L.lentus MN190936
301	Slovakia: Belianske Tatry	Podspady 49.2759, 20.18796	L.lentus	L.lentus MN191145	L.gibbus MT858570	L.lentus MN190937
302	Slovakia: Belianske Tatry	Rzepiska 49.34706, 20.14819	L.lentus	L.lentus MN191146	L.gibbus MT858571	L.lentus MN190938
303	Slovakia: Belianske Tatry	Łapsze Niżne 49.38451, 20.23823	L.tessulatus	none	L.tessulatus MT858572	L.tessulatus MN190939
304	Austria: Steirisch-niederösterreichische Kalkalpen	Trattenbach 47.61236, 15.91665	L.lentus	L.lentus MN191147	L.lentus MT858573	L.lentus MN190940
305	Austria: Steirisch-niederösterreichische Kalkalpen	Trattenbach 47.61236, 15.91665	L.lentus	L.lentus MN191148	none	L.lentus MN190941
306	Austria: Semmering	Mariasdorf 47.37801, 16.24173	L.lentus	L.lentus MN191149	none	L.lentus MN190942
307	Austria: Semmering	Mariasdorf 47.37518, 16.24198	L.lentus	L.lentus MN191150	L.lentus MT858574	none
308	Austria: Gesäuse	Hielfau 47.58693, 14.80618	L.lentus	none	L.lentus MT858575	L.lentus MN190943
309	Austria: Gesäuse	Hielfau 47.58693, 14.80618	L.lentus	L.lentus MN191151	L.lentus MT858576	L.lentus MN190944
310	Austria: Seetaler Alpen	Rapottendorf 47.05568, 14.45006	Liophloeodes	L.lentus MN191152	L.lentus MT858577	L.lentus MN190945
311	Slovenia: Karavanke	Dovje 46.47014, 13.94817	Liophloeodes	none	none	none
312	Slovenia: Karavanke	Dovje 46.47014, 13.94817	L.tessulatus	L.tessulatus MN191153	L.tessulatus MT858578	L.tessulatus MN190946
313	Slovenia: Julijskie Alpe	Bovec 46.34386, 13.57493	L.tessulatus	L.tessulatus MN191154	L.tessulatus MT858579	L.tessulatus MN190947
314	Slovenia: Kras	Postojna 5.78796, 14.21936	L.tessulatus	L.tessulatus MN191155	L.tessulatus MT858580	L.tessulatus MN190948
315	Croatia: Gorski Kotar	Lokve 45.36478, 14.72818	L.tessulatus	none	none	none
316	Austria: Steirisch-niederösterreichische Kalkalpen	Trattenbach 47.61236, 15.91665	L.tessulatus	L.tessulatus MN191156	none	none
318	Poland: Beskid Wyspowy	Lubomierz 49.59292, 20.22636	Liophloeodes	L.lentus MN191157	L.gibbus	L.lentus MN190949
319	Poland: Beskid Wyspowy	Lubomierz 49.61818, 20.18433	L.tessulatus	L.tessulatus MN191158	none	L.tessulatus MN190950
334	Slovakia: Beskid Niski	Palota 49.26477, 21.99241	L.gibbus	L.gibbus MN191159	none	L.gibbus MN190951
335	Slovakia: Laborecká vrchovina	Palota 49.26477, 21.99241	L.gibbus	L.gibbus MN191160	L.gibbus MT858581	L.gibbus MN190952
336	Slovakia: Muranska Planina	Pohorelska Masa 48.84222, 20.04138	L.liptoviensis	L.liptoviensis MN191161	L.liptoviensis MT858582	L.liptoviensis MN190953
337	Slovakia: Muranska Planina	Pohorelska Masa 48.84222, 20.04138	L.liptoviensis	L.liptoviensis MN191162	none	none
338	Slovakia: Muranska Planina	Pohorelska Masa 48.84222, 20.04138	L.liptoviensis	L.liptoviensis MN191163	L.liptoviensis MT858583	L.liptoviensis MN190954
339	Slovakia: Saris	Plavec 49.26099, 20.8419	L.gibbus	L.gibbus MN191164	none	L.gibbus MN190955
340	Slovakia: Saris	Plavec 49.26099, 20.8419	L.gibbus	L.gibbus MN191165	MT858584	L.gibbus MN190956
341	Slovakia: Saris	Plavec 49.26099, 20.8419	L.gibbus	L.gibbus MN191166	none	none
342	Slovakia: Zvolenska Kotlina	Ponicka Huta 48.84803, 18.90456	L.liptoviensis	L.liptoviensis MN191167	L.liptoviensis MT858585	L.liptoviensis MN190957
343	Slovakia: Zvolenska Kotlina	Ponicka Huta 48.84803, 18.90456	L.liptoviensis	L.liptoviensis MN191168	L.lentus MT858586	L.liptoviensis MN190958
344	Slovakia: Zvolenska Kotlina	Ponicka Huta 48.84803, 18.90456	L.liptoviensis	L.liptoviensis MN191169	L.lentus MT858587	none
345	Slovakia: Turčianska kotlina	Cremosne 48.84803, 18.90456	L.lentus	L.lentus MN191170	L.lentus MT858588	none MN190959
346	Ukraine: Gorgany	Synewyr 48.61669, 23.67975	L.liptoviensis	L.liptoviensis MN191171	none	none
347	Ukraine: Gorgany	Synewyr 48.61669, 23.67975	L.liptoviensis	L.liptoviensis MN191172	none	L.liptoviensis MN190960
348	Ukraine: Gorgany	Synewyr 48.61669, 23.67975	L.liptoviensis	L.liptoviensis MN191173	L.liptoviensis MT858589	L.liptoviensis MN190961
349	Poland: Beskid Niski	Krempna 49.51097, 21.50041	L.gibbus	L.gibbus MN191174	L.gibbus MT858590	none
350	Poland: Beskid Niski	Krempna 49.51097, 21.50041	L.gibbus	L.gibbus MN191122	L.gibbus MT858591	L.gibbus MN190962
351	Poland: Beskid Niski	Krempna 49.51097, 21.50041	L.gibbus	L.gibbus MN191176	L.gibbus MT858592	L.gibbus MN190963
352	Poland: Beskid Niski	Krempna 49.51097, 21.50041	L.gibbus	L.gibbus MN191088	L.gibbus MT858593	L.gibbus MN190964
353	Poland: Brama Krakowska	Ruczaj (Kraków) 50.01662, 19.90345	L.tessulatus	L.tessulatus MN191178	L.tessulatus MT858594	none
354	Poland: Brama Krakowska	Ruczaj (Kraków) 50.01662, 19.90345	L.tessulatus	L.tessulatus MN191179	L.tessulatus MT858595	L.tessulatus MN190965
357	Romania: Transylvanian Plateau	Turda (Cheile Turzi) 46.5636, 23.68595	L.liptoviensis	L.liptoviensis MN191180	L.liptoviensis MT858596	L.liptoviensis MN190966
358	Slovakia: Breznianska kotlina	Brezno 48.83298, 19.6611	L.liptoviensis	L.liptoviensis MN191181	L.lentus MT858597	L.liptoviensis MN190967
362	Poland: Gorce	Jaszcze (Ochotnica) 49.51221, 20.2395	Liophloeodes	L.lentus MN191182	L.gibbus MT858598	none
363	Slovakia: Breznianska kotlina	Brezno 48.83298, 19.6611	L.liptoviensis	none	L.lentus MT858599	none
364	Poland: Beskid Niski	Krempna near Huta Krempska 49.50013, 21.49028	L.gibbus	none	none	none
365	Slovakia: Nizke Tatry	Trnovo 49.02458, 18.83725	L.lentus	L.lentus MN191183	none	L.lentus MN190968
367	Serbia: Fruška gora	Rakovac 45.19186, 19.77073	L.lentus	none	L.lentus MT858600	none
370	Poland: Beskid Niski	Rozdziele 49.64028, 21.28975	L.tessulatus	none	L.tessulatus MT858601	L.tessulatus MN190969
372	Slovakia: Tatry	Podspady 49.2759, 20.18796	L.lentus	none	none	L.lentus MN190970
373	Poland: Bieszczady	Stuposiany 49.17681, 22.6837	L.gibbus	none	L.gibbus MT858602	none
374	Slovakia: Nizke Tatry	Liptovska Luzna 48.94174, 19.31981	Liophloeodes	none	L.lentus MT858603	L.lentus MN190971
375	Slovakia: Breznianska kotlina	Brezno 48.83298, 19.6611	L.liptoviensis	none	L.lentus MT858604	none
376	Slovakia: Nizke Tatry	Liptovska Luzna 48.94174, 19.31981	Liophloeodes	none	L.lentus MT858605	none
377	Slovakia: Nizke Tatry	Liptovska Luzna 48.94174, 19.31981	Liophloeodes	none	L.lentus MT858606	none
378	Slovakia: Nizke Tatry	Liptovska Luzna 48.94174, 19.31981	Liophloeodes	none	L.lentus MT858607	none
379	Slovenia: Labotniške Alpe	Javnik 46.59111, 15.36712	Liophloeodes	none	L.lentus MT858608	none
380	Poland: Masyw Śnieżnika	Kletno 50.25575, 16.85606	L.lentus	none	none	none
381	Poland: Beskid Wyspowy	Łętowe 49.65135, 20.15822	Liophloeodes	none	L.gibbus MT858609	none
382	Slovenia: Karavanke	Dovje 46.46783, 13.94802	Liophloeodes	none	L.liptoviensis MT858610	none
383	Slovakia: Veľká Fatra	Turecka 48.84851, 19.08778	L.lentus	none	L.lentus MT858611	none
384	Poland: Tatry Wysokie	Upłaz (Poronin) 49.3219, 20.06356	Liophloeodes	none	L.gibbus MT858612	none
385	Slovakia: Nizke Tatry	Korytnica Kupele 48.88987, 19.285	L.lentus	none	L.lentus MT858613	none
388	Poland: Beskid Niski	Bednarka 49.64112, 21.3339	Liophloeodes	none	L.gibbus MT858614	none
389	Romania: Transylvanian Plateau	Cluj-Napoca- botanical garden 46.7603, 23.5867	Liophloeodes	L. gibbus MN191184	L.gibbus MT858615	none
391	Slovakia: Nizke Tatry	Trnovo 49.02458, 18.83725	L.lentus	none	L.lentus MT858616	none
392	Slovenia: Karawanki	Dovje 46.46783, 13.94802	Liophloeodes	none	L.lentus MT858617	none
393	Slovenia: Karawanki	Dovje 46.46783, 13.94802	Liophloeodes	none	L.lentus MT858618	none
394	Poland: Beskid Niski	Długie 49.46751, 21.38729	Liophloeodes	none	none	none
395	Poland: Beskid Wyspowy	Jastrzębiec 49.71528, 20.17986	Liophloeodes	none	none	none
396	Poland: Beskid Niski	Wołowiec 49.51875, 21.35282	L.tessulatus	none	none	none
397	Poland: Pieniny	Szczawnica 49.42612, 20.44915	L.lentus	none	none	none
398	Poland: Pieniny	Krościenko-Zawodzie 49.43683, 20.43291	Liophloeodes	none	none	none
399	Poland: Gorce	Ochotnica 49.51817, 20.32195	L.tessulatus	none	none	none
400	Slovakia: Nizke Tatry	Trnovo 49.02458, 18.83725	L.lentus	none	none	none
403	Poland: Góry Bystrzyckie	Wojtowice 50.2997, 16.54159	L.lentus	L.lentus MN191185	L.gibbus MT858619	none
406	Poland: Dolina Orlicy	Rudawa 50.23874, 16.52782	L.lentus	L.lentus MN191186	none	none
408	Poland: Dolina Orlicy	Rudawa 50.25207 16.51409	L.liptoviensis	L.liptoviensis	none	none
410	Poland: Polish Jurassic Highland	Dolina Prądnika (Ojców) 50.18189, 19.83804	L.lentus	L.lentus MN191188	none	none
411	Romania: Făgăraș	Piscu Negru river 45.55561, 24.61409	L.liptoviensis	none	L.liptoviensis MT858620	none
416	Poland: Polish Jurassic Highland	Brandysówka (Będkowice) 50.15485, 19.73789	L.lentus	L.lentus MN191189	L.gibbus MT858621	none
420	Poland: Kotlina Oświęcimska	Pszczyna 49.97933, 18.94355	L.lentus	L.lentus MN191190	L.gibbus MT858622	L.lentus MN19097
421	Poland: Kotlina Oświęcimska	Kopciowice 50.09916, 19.21621	L.tessulatus	none	L.tessulatus MT858623	L.tessulatus MN190973
422	Romania: Munții Aninei	Steierdorf 45.059924, 21.856798	L.liptoviensis	L.liptoviensis MN191192	none	none
425	Bulgaria: Central Balkan	Ribaritsa 42.84506, 24.44186	L.pupillatus	L.pupillatus MN191193	L.liptoviensis MT858624	L.pupillatus MN190974
428	Serbia: Milevska Planina	Gornja Lisina 42.56988, 22.39003	L.lentus	L.lentus MN191194	L.gibbus MT858625	none
436	Poland: Beskid Śląski	Jaworzynka 49.55558, 18.88686	L.lentus	L.lentus MN191195	L.gibbus MT858626	none
439	Czech Republic: Hrubý Jesenik	Světlá Hora 50.0457, 17.34104	L.tessulatus	none	L.tessulatus MT858627	MN190975 L.tessulatus
445	Czech Republic: Hrubý Jesenik	Branna 50.17341, 17.03848	L.lentus	L.lentus MN191196	none	L.lentus MN191007
448	Poland: Góry Stołowe	Polanica-Zdrój 50.42534, 16.50495	L.tessulatus	L.tessulatus MN191197	L.tessulatus MT858628	L.tessulatus MN190976
450	Poland: Masyw Śnieżnika	Sienna 50.26228, 16.82404	L.lentus	none	L.gibbus MT858629	L.lentus MN190977
460	Poland: Brama Krakowka	Zakrzówek (Kraków) 50.0413, 19.91028	L.lentus	none	L.gibbus MT858630	L.lentus MN190978
461	Slovakia: Oravska vrchovina	Podbiel 49.30951, 19.49673	L.lentus	none	L.gibbus MT858631	none
462	Slovakia: Nizke Tatry	Jamnik 49.06725, 19.7186	Liophloeodes	L.lentus MN191198	L.lentus MT858632	none
466	Slovakia: Beskid Niski	Havaj 49.25783, 21.79152	L.gibbus	L. gibbus MN191199	none	none
468	Slovakia: Beskydske predhorie	Podhorod 48.80583, 22.28072	L.gibbus	L.gibbus MN191200	L.gibbus MT858633	L.gibbus MN190978
471	Slovakia: Slovenske rudohorie	Medzev 48.7098, 20.85866	Liophloeodes	L.lentus MN191201	none	none
474	Hungary: Bukk	Nagyvisno 48.14753, 20.45048	L.liptoviensis	none	L.liptoviensis MT858634	none
475	Romania: Muntii Gutai	Mara 47.71201, 23.77646	L.liptoviensis	none	none	none
482	Poland: Pogórze Wiśnickie	Rajbrot 49.8153, 20.50573	L.gibbus	L.gibbus MN191202	none	L. gibbus MN190980
484	Ukraine: Woroniaki (Podolian Upland)	Podhorce 49.95343, 25.00918	L.gibbus	L.gibbus MN191203	L.gibbus MT858635	none
486	Ukraine: Tołtry (Podolian Upland)	Kręciłów 49.22665, 26.20693	L.gibbus	L.gibbus MN191204	L.liptoviensis MT858636	L.gibbus MN190981
488	Ukraine: Dniestrowski Kanion (Podolian Upland)	Dobrowlany 48.67715, 25.73921	L.herbstii	none	L.liptoviensis MT858637	none
492	Ukraine: Cheremosh valley	Kuty Stare 48.29366, 25.1666	L.herbstii	L.herbstii MN191205	none	none
499	Ukraine: Muntii Maramuresului foothills	Velikiy Bychkov 47.93501, 24.10024	L.liptoviensis	none	L.liptoviensis MT858638	none
500	Ukraine: Muntii Maramuresului foothills	Velikiy Bychkov 47.93501, 24.10024	L.liptoviensis	none	none	L. liptoviensis MN190982
501	Slovakia: Oravska vrchovina	Podbiel 49.3095167, 019.4967333	L.lentus	none	L.lentus MT858639	none
502	Slovakia: Kosicka kotlina	Mała Ida 48.6757833, 021.1433167	Liophloeodes	none	none	none
503	Slovakia: Slovenske rudohorie	Medzev 48.7098000, 020.8586667	Liophloeodes	none	L.liptoviensis MT858640	L.lentus MN190983
504	Slovakia: Slovenske rudohorie	Smolnik 48.7236000, 020.7136000	none	none	none	L.liptoviensis MN190984
505	Hungary: Aggteleki-karszt	Aggtelek 48.422284, 20.500501	none	L.gibbus MN191206	none MT858641	none
506	Romania: Muntii Gutai	Mara 47.71201, 23.77646	L.liptoviensis	none	none	none
507	Romania: Muntii Maramuresului	Rona de Sus 47.8611333, 024.1038167	L.liptoviensis	L.liptoviensis MN191207	none	L.liptoviensis MN190985
508	Romania: Viseu valley	Borsa 47.6234167, 024.7639333	L.liptoviensis	none	L.liptoviensis MT858642	none
509	Romania: Muntii Tibles	Telciu 47.4368000, 024.3896833	L.liptoviensis	none	none	L.liptoviensis MN190986
510	Hungary: Zala hills	Bázakerettye 46.5290833, 016.7494167	L.lentus	L.lentus MN191208	L.gibbus MT858643	none
511	Slovakia: Nizke Tatry	Jamnik 49.06725, 19.7186	none	L. lentus MN191209	L.lentus MT858644	L.lentus MN190987
512	Czech Republic: Bile Karpaty	Horni Niemci 48.9192833, 017.6519333	L.lentus	none	L.liptoviensis MT858645	none
513	Slovakia: Vysoke Tatry	Vysne Hagy 49.1177833, 020.1206167	L.liptoviensis	none	none	none
514	Slovakia: Slovenske rudohorie	Korytne 49.0164333, 020.8577500	none	none	none	none
515	Hungary: Bukk	Nagyvisno 48.14753, 20.45048	L.lentus	none	L.gibbus MT858646	none
516	Slovakia: Laborecká vrchovina	Havaj 49.25783, 21.79152	L.gibbus	L.gibbus MN191210	L.gibbus MT858647	L.gibbus MN190988
517	Slovakia: Bukovské vrchy	Pčoliné 49.0455000, 022.1751500	L.gibbus	none	none	none
518	Slovakia: Beskydské predhorie	Podhorod 48.80583, 22.28072	L.gibbus	none	none	L.gibbus MN190989
519	Slovakia: Beskydské predhorie	Podhorod 48.80583, 22.28072	L.gibbus	none	none	none
520	Slovakia: Bukovské vrchy	Klenová 48.929150, 22.361400	L.gibbus	none	none	none
521	Ukraine: Woroniaki (Podolian Upland)	Podhorce 49.95343, 25.00918	L.gibbus	L.gibbus MN191211	none	none
522	Ukraine: Cheremosh valley	Kuty Stare 48.29366, 25.1666	L.herbstii	none	L.liptoviensis MT858648	L.herbstii MN190990
523	Ukraine: Pistynka valley	Pistyń 48.339450, 25.051933	L.herbstii	none	L.liptoviensis MT858649	L.herbstii MN190991
524	Ukraine: Gorgany	Delatyn 48.545483, 24.665317	L.herbstii	L.herbstii MN191212	none	L.herbstii MN190992
525	Ukraine: Gorgany	Jaremcze 48.441933, 24.546617	L.herbstii	none	L.liptoviensis MT858650	L.herbstii MN190993
526	Ukraine: Czornohora	Kvasy 48.163167, 24.277867	none	L.liptoviensis MN191213	L.liptoviensis MT858651	none
527	Ukraine: Czornohora	Mencul 48.171167, 24.308183	none	none	L.liptoviensis MT858652	none
528	Ukraine: Czornohora	Mencul 48.156483, 24.337583	L.liptoviensis	none	none	L.liptoviensis MN190994
529	Ukraine: Skoliwśki Beskydy	Korczyn 49.090800, 23.558117	L.liptoviensis	L.liptoviensis MN191214	none	L.liptoviensis MN190995
530	Ukraine: Skoliwśki Beskydy	Urycz 49.189517, 23.408567	L.liptoviensis	L.liptoviensis MN191215	none	none
531	Ukraine: Woroniaki (Podolian Upland)	Podhorce 49.953433, 25.009183	L.gibbus	L.gibbus MN191216	none	L.gibbus MN190996
532	Ukraine: Skoliwśki Beskydy	Skole 49.029517, 23.510550	L.gibbus	L.gibbus MN191217	L.gibbus MT858653	none
533	Ukraine: Roztocze	Iwano-Frankowe 49.922300, 23.673267	L.gibbus	none	L.gibbus MT858654	none
534	Ukraine: Podolian Upland	Hrymailiv 49.331950, 26.011950	L.herbstii	L.herbstii MN191218	none	L.herbstii MN190997
535	Ukraine: Tołtry (Podolian Upland)	Kręciłów 49.22665, 26.20693	L.gibbus	none	none	L.gibbus MN190998
536	Ukraine: Carpathian Uphills	Vyhoda 49.050933, 25.863667	L.herbstii	none	L.liptoviensis MT858655	none
537	Ukraine: Dniester Canyon (Podolian Upland)	Dobrowlany 48.67715, 25.73921	L.herbstii	none	none	L.herbstii MN190999
538	Ukraine: Dniester Canyon (Podolian Upland)	Dzhurynskyi 48.798800, 25.586900	L.gibbus	none	none	L.gibbus MN191000
539	Ukraine: Dniester Canyon (Podolian Upland)	Dzhurynskyi 48.804900, 25.590033	L.gibbus	none	L.gibbus MT858656	none
540	Ukraine: Cheremosh valley	Brusnytsya 48.367400, 25.590150	L.herbstii	none	L.liptoviensis MT858657	none
541	Romania: Munții Aninei	Steierdorf 45.059924, 21.856798	L.liptoviensis	L.liptoviensis MN191219	L.liptoviensis MT858658	none
542	Romania: Munții Aninei	Bozovici 44.944883, 22.003300	L.liptoviensis	L.liptoviensis MN191220	none	L.liptoviensis MN191001
543	Bulgaria: Stara planina	Ribaritsa 42.828133, 24.397983	L.pupillatus	none	L.liptoviensis MT858659	none
544	Bulgaria: Stara planina	Ribaritsa 42.84506, 24.44186	L.pupillatus	L.pupillatus MN191221	L.liptoviensis MT858660	none
545	Serbia: Vlasina	Ćurkovica 42.693967, 22.212183	L.lentus	none	L.gibbus MT858661	L.lentus MN191002
546	Serbia: Vlasina/Balkan	Gornja Lisina 42.569883, 22.390033	L.lentus	L.lentus MN191222	L.lentus MT858662	none
547	Serbia: Vlasina/Balkan	Gornja Lisina 42.569883, 22.390033	L.lentus	none	none	L.lentus MN191003
548	Poland: Beskid Śląski	Ustroń 49.742617, 18.790400	none	L.lentus MN191223	none	none
549	Czech Republic: Zlatohorska Vrchovina	Heřmanovice 50.202733, 17.403250	L.tessulatus	none	none	L.tessulatus MN191004
550	Czech Republic: Zlatohorska Vrchovina	Zlaté Hory 50.255717, 17.379417	L.tessulatus	none	none	L.tessulatus MN191005
551	Czech Republic: Hrubý Jesenik	Lipová-lázně 50.208167, 17.088183	L.lentus	L.lentus MN191224	none	L.lentus MN191006
552	Czech Republic: Hrubý Jesenik	Branna 50.17341, 17.03848	L.lentus	none	none	L.lentus MN191008
553	Czech Republic: Hanušovická vrchovina	Bohdíkov 50.029983, 16.902833	L.lentus	none	none	L.lentus MN191009
554	Czech Republic: Hanušovická vrchovina	Bohdikov 50.006000, 16.894750	L.lentus	none	none	L.lentus MN191010
555	Poland: Góry Stołowe	Polanica Górna 50.42534, 16.50495	L.tessulatus	L.tessulatus MN191225	none	none
556	Poland: Nysa Kłodzka valley	Bystrzyca Kłodzka 50.303050, 16.655117	none	none	none	none
557	Poland: Nysa Kłodzka valley	Bystrzyca Kłodzka 50.303050, 16.655117	none	none	none	none
558	Poland: Masyw Śnieżnika	Sienna 50.26228, 16.82404	L.lentus	none	none	L.lentus MN191011
559	Poland: Beskid Śląski	Wisła 49.676783, 18.844417	L.lentus	none	none	L.lentus MN191012
560	Poland: Góry Bystrzyckie	Duszniki-Zdrój 50.377933, 16.362667	L.lentus	none	none	none
561	Poland: Góry Bystrzyckie/Góry Orlickie	Piaskowice 50.288900, 16.468183	L.lentus	L. lentus MN191226	L.gibbus MT858663	L.lentus MN191013
562	Poland: Góry Bystrzyckie	Poniatów 50.225467, 16.571667	L.tessulatus	none	none	none
563	Czech Republic: Mohelnická brázda	Svebohov 49.923667, 16.826983	L.lentus	none	none	L.lentus MN191014
564	Poland: Góry Stołowe	Pasterka 50.492083, 16.327167	L.tessulatus	none	none	L.tessulatus MN191015
565	Poland: Góry Stołowe	Łężyca 50.426433, 16.370867	L.lentus	none	none	L.lentus MN191016
566	Poland: Beskid Śląski	Wisła 49.622983, 18.875050	L.lentus	none	none	none
567	Poland: Beskid Śląski	Istebna 49.55558, 18.88686	L.lentus	L.lentus MN191227	L.gibbus MT858664	L.lentus MN191017
568	Czech Republic: Nízký Jeseník	Razová 49.944917, 17.513917	L.tessulatus	none	none	none
569	Czech Republic: Nízký Jeseník	Bruntál 49.976500, 17.466767	none	none	none	none
570	Czech Republic: Hrubý Jesenik	Světlá Hora 50.0457, 17.34104	L.tessulatus	L.tessulatus MN191228	none	L.tessulatus MN191018
571	Czech Republic: Hrubý Jesenik	Ludvíkov 50.089933, 17.329717	L.tessulatus	L.tessulatus MN191229	none	L.tessulatus MN191019
572	Poland: Polish Jurassic Highland	Będkowice Brandysówka 50.154850, 19.737900	L.lentus	L.lentus MN191230	none	L.lentus MN191020
573	Poland: Polish Jurassic Highland	Łazy 50.180183, 19.750133	L.tessulatus	none	none	L.tessulatus MN191021
574	Poland: Polish Jurassic Highland	Czerna 50.162150, 19.632850	L.tessulatus	none	none	L.tessulatus MN191022
575	Poland: Polish Jurassic Highland	Dolina Prądnika (Ojców) 50.18189, 19.83804	L.lentus	none	none	L.lentus MN191023
576	Poland: Kotlina Oświęcimska	Pszczyna 49.97933, 18.94355	L.lentus	none	none	L.lentus MN191024
577	Poland: Kotlina Oświęcimska	Kopciowice 50.09916, 19.21621	L.tessulatus	none	none	L.tessulatus MN191025
578	Poland: Masyw Śnieżnika	Stronie Śląskie 50.303029, 16.871477	L.lentus	none	L.gibbus MT858665	L.lentus MN191026
579	Poland: Polish Jurassic Highland	Dolina Prądnika (Ojców) 50.211383, 19.831417	L.lentus	none	none	L.lentus MN191027
580	Romania: Făgăraș	Piscu Negru river 45.55561, 24.61409	L.herbstii	none	none	L.herbstii MN191028
581	Romania: Mureș valley	Lunca Brandului 46.957330, 25.087150	L.herbstii	L.herbstii MN191231	none	L.herbstii MN191029
582	Romania: Mureș valley	Lunca Brandului 46.957330, 25.087150	L.herbstii	none	none	L.herbstii MN191030
583	Poland: Masyw Śnieżnika	Kletno 50.261770, 16.869855	L.lentus	L.lentus MN191232	L.gibbus MT858666	L.lentus MN191031
584	Poland: Góry Bystrzyckie	Wojtowice 50.2997, 16.54159	L.lentus	none	none	L.lentus MN191032
585	Czech Republic: Orlické hory	Klášterec nad Orlicí 50.133056, 16.541611	L.lentus	L.lentus MN191233	L.gibbus MT858667	L.lentus MN191033
586	Poland: Bieszczady	Stebnik 49.471209, 22.630849	L.liptoviensis	none	none	L.liptoviensis MN191034
587	Poland: Orlica valley	Rudawa 50.23874, 16.52782	Liophloeodes	none	none	L. lentus MN191035
589	Poland: Orlica valley	Rudawa (border) 50.25207 16.51409	L.lentus	none	none	L.lentus MN191036
591	Poland: Podgórze Bocheńskie	Bochnia 49.941867, 20.443167	L.gibbus	none	L.gibbus MT858668	L.gibbus MN191037
592	Poland: Pogórze Wiśnickie	Rajbrot 49.8153, 20.50573	L.gibbus	none	none	L. gibbus MN191038
593	Poland: Brama Krakowska	Kraków 50.041300, 19.910283	L.lentus	none	none	L.lentus MN191039
601	Poland: Beskid Żywiecki	Sucha Góra 49.52777, 19.14027	Liophloeodes	none	none	none
602	Poland: Beskid Żywiecki	Zawoja 49.66808, 19.58211	L.tessulatus	none	none	none
603	Poland: Beskid Niski	Wołowiec 49.51875, 21.35282	Liophloeodes	none	none	none
604	Poland: Brama Krakowska	Kraków 50.041300, 19.910283	L.lentus	none	none	none
605	Czech Republic: Hanušovická vrchovina	Bohdikov 50.006000, 16.894750	none	none	none	none
606	Poland: Bieszczady	Wołosate 49.06731, 22.67973	none	none	none	none
607	Slovakia: Nizke Tatry	Korytnica Kupele 48.88987, 19.285	L.lentus	none	none	none
608	Poland: Tatry Zachodnie	Adamica 49.23333, 19.91665	none	L.lentus MN191191	none	none
609	Slovakia: Laborecká vrchovina	Minovce 49.147083, 21.655317	none	none	none	none
610	Poland: Tatry Zachodnie	Adamica 49.23333, 19.91665	none	none	none	none
611	Romania: Muntii Vladeasa (Apuseni)	Rachicele 46.71528, 22.89112	none	none	none	none
